# Supplementary material for: The Influence of Temperature on the Growth, Sporulation, Colonization, and Survival of Trichoderma spp. in Grapevine Pruning Wounds
Source: MDPI journal article supplement (doi:10.3390/agronomy11091771), 2021-09-03
Supplement: s1 [file s1]

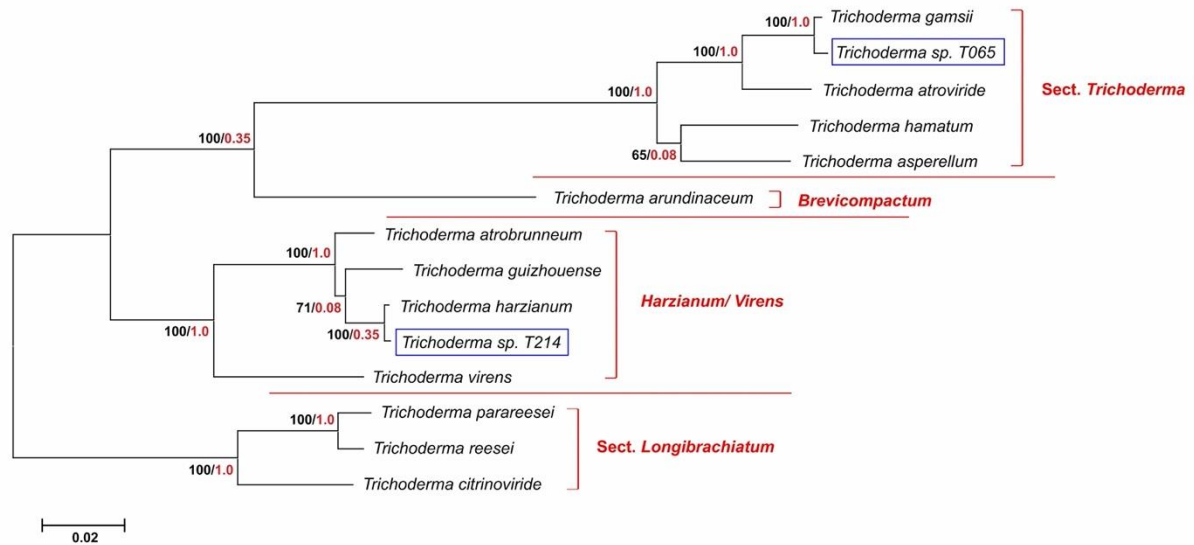

**Figure S1.** *Trichoderma* species phylogenetic tree. The tree was inferred from alignments of coding nucleotide sequences of *act1*, *cal1*, *fas1*, *lcb2*, *rpb2*, and *tef1* housekeeping genes. Trees for these six genes were inferred by two methods, and the results were combined: 1) nucleotide sequences from each gene were aligned separately, the alignments were concatenated, and the resulting concatenated alignment was subjected to maximum likelihood analysis using IQ-tree software 1.6.7[1]. Branch support was determined by bootstrap analysis after 1000 pseudoreplicates. 2) nucleotide sequences from each housekeeping gene were aligned separately and subjected to maximum likelihood analysis separately. The resulting six trees were used to generate a consensus tree using RAxML software [2] Branch support was determined by internode certainty (IC) analysis as implemented in RAxML[3]. The tree in the figure was inferred using method 1 but shows branch support values derived from both methods: bootstrap values are shown before the forward slash (i.e. /), and the IC values are shown in red color after the forward slash. At the right side of the tree, there are indicated in red color the names of the *Trichoderma* Clades or Sections where the different species included in the present study are located. The strains isolated and analyzed in the present work is squared with a blue line.

1. Nguyen, L.T.; Schmidt, H.A.; Von Haeseler, A.; Minh, B.Q. IQ-TREE: A fast and effective stochastic algorithm for estimating maximum-likelihood phylogenies. *Mol. Biol. Evol.* **2014**, *32*, 268–274, doi:10.1093/molbev/msu300.
2. Stamatakis, A. RAxML version 8: A tool for phylogenetic analysis and post-analysis of large phylogenies. *Bioinformatics* **2014**, *30*, 1312–1313, doi:10.1093/bioinformatics/btu033.
3. Salichos, L.; Stamatakis, A.; Rokas, A. Novel information theory-based measures for quantifying incongruence among phylogenetic trees. *Mol. Biol. Evol.* **2014**, *31*, 1261–1271, doi:10.1093/molbev/msu061.

Supplementary Data. Appendix. Sequences retrieved from the genomes analyzed in this work.

---

Appendix S1. *act1* resulting coding sequences retrieved from the genomic sequences

---

>*Trichoderma* sp. T214

ATGGCCCAGCAGCCTTTGCCCACGTCGGCGCAGCCAACCGACATTTACGGCGGAGATGAGGT  
CTCTGCCCTCGTTCTCGACCCCGGCTACTGTAACACGCGAGCAGGTTTTGCCGGCGAAGATGT  
TCCCAAATCAATCCTGCCGTCCTTCTACGGCCACATCACCAGCGATCCCCCGCGAGACCTGTT  
TGCGGATGAGTGCATCATCCCGCGCGGCGACTTCGAGGTCCGCAACTACATGAACAAGGACA  
GCGTTGTGGAGGATTGGGATGTCGCCGCCAAGATGTGGGAGTTTATGCTGGTTAAGCGCCTGC  
AGCCCGAGAGACAGACGCCTCCGTCCAAGAATGGATTGAATGACGACGTGAAAGACCAGGA  
TGCGGAGGGCGATGTCGCGATGGAGGAGATCGAGGGTCAGGAAAAGCCTCTGGAGGAGTTT  
CCATTGCTGATGACAGAAGCTCCCTGGAACTCGCCCCAAGGCGCGTGAAAAGGCTATTGAGCT  
TAGCATGGAGAGCTGGGGGACCCCGGCCCTTTGGTTGAGCCGGACACCTGTTCTATCTGCCTT  
CGCTGCTGGCAAAGCGACGGCTCTTGTTCATCGATATCGGTGGCGCAAACACCTCCGTCACAG  
CTATGCACGACGGCATGGTTCTCAAGAGATCTATCCAGCGATCACCTGCAGGTGGCCTGTGGC  
TGCTTTCGAGATCCGCAACATGTGGGAAACCTCTGAGCCCCAAGGTCGACTTGATCCCGACAT  
TCATGGTTGAGAACAAAGACTCCTGTTCGATGCCCTCGCCCCCGCCAGGCACGACTACGCGAA  
TTCCCATACAAGATTCATGACTCCTTCCGAGCATTCGAAGAGGAGCGACTGCTCACCGAGTTT  
AAAGAGTCCGTCGTCGAGGTTTGGCGTGGCCCCGGACGGTATGGTGCCGCTGGGAACGAGG  
AGTACATCAAGTCACAGCCTGGCCGCGTATTTGAGATGCCCGATGGCTACAACCAGATGTGGC  
GCGAGCAGCGATTCAAGGTGGCCGAGGGAATGTGGGATGAGAACGCCGATACCCCGTTCCCG  
GAGGCGGAGCGTCTCACCAAGGCTCAGACTATCCCTGAGCTTATCCGCTCTGCTCTCAACGCC  
ATTGATGTTGATCTTCGGGGCAACCTTCTCGCTAATGTTGTCGTTACTGGTAGCACAAGCTTGA  
TCAACGGCTTCAACGACCGACTCAACAATGAGCTGACAGCCATGTATCCGGGATGAAGATC  
AAGATTACGCGGCCGGCTTGTGAGCGAGCGTAGATTCCGGTGCTTGGATCGGCGGCAGCAT  
TCTGGCCAGTCTGGGTACTTCCATCAGATGTGGATATCCAAGAAGGAGTATGAGGAAAACGG  
ACCGGGCATTGTGAGAAAGCGATGCAAATAG

>*Trichoderma* sp. T065

ATGGCCCAGCAGCCTTTGCCCACGTCGGCTCAGCCAACCGACATCTACGGCGGAG  
ATGAGGTCTCTGCCCTCGTTCTTGACCCCGGCTACTGCAATACGCGAGCAGGCTTCGCTGGCG  
AAGATGTCCCAAGTCAATTCTACCATCGTTCTACGGCCATGTCACCAGCGACCCTCCCCGAG  
ATTTATTTGGCGACGAGTGCATCATCCACGAAGCGACTTTGAGGTCCGCAACTACATGAACA  
AGGACAGCGTCGTAGAGGACTGGGATGTGGCGGCTAAGATGTGGGAATTCATGCTGGTTAAG  
CGCCTACAGCCCAGCGACAGACGCCGCCATCAAAGAATAAGCTAAACGACGACGTGAAGG  
AGCAGGATGGCGAAGGAGATGTCGCGATGGAAGAAGTCGAGACGATGGAGAAGGCTCTAGA  
AGAGTTCCCCTTGCTGATGACAGAAGCTCCGTGGAACTCGCCCCAAGGCACGTGAAAAGGCC  
ATCGAGCTCAGCATGGAGAGCTGGGGGACTCCCGCCTTCTGGCTAAGCCGGACTCCCGTTCT  
GTCGTCAATTCGCCGCTGGAAAAGCTACTGCCCTTGTTCATTGACGTTGGTGGCGCCAATACCTC  
CGTTACAGCTATCCATGATGGCATGGTTTTGAAGCGATCTATCCAGCGATCACCCGCGGGCGGT  
CTATGGCTGTCTTCGAGATCCGCAACATGTGGGAACTTCCGAGCCGAAAGTGGACTTGTT  
CCGACGTTTATGGTTGAGAACAAAGTCTCCCGTGGATGCTCTTTCTCCTGCCAGGCGCGACTA  
CGCGAGTTCCCTTACAAGATCCACGACTCTTTTGAACATTTGAAGAAGAGCGGCTGTTGACC  
GAGTTCAAGGAGTCCGTTGTTGAGGTTTGGCGTGGACCTGGAAGATACGGCGCCGCTGGAAA  
CGAAGAGTACATCAAATCTCAGCCTGGCCGTGTGTTGAGATGCCTGATGGCTACAACCAGAT  
GTGGCGGAGCAGCGATTCAAGGTGCTGAGGGCATGTGGGACGAAAACGCCGGGTACCCC  
GTCCCCGAGTCGGAGCGCCTCACCAAGGCCAGACCATCCCCGAACCTTATCCGTTCCGCCCTC  
AATGCTATTGACGTTGACCTGCGGGGCAACCTCCTCGCCAACGTCGTTGTTACGGGAAGCAC  
AAGTTTGATCAACGGCTTCAACGACCGTCTAAATAACGAGCTGACAGCGATGTACCCTGGGCT  
GAAGATCAAGATTACGCTGCAGGTCTGTGAGCGAGCGCAGATTCCGGTGCTTGGATTGGTG  
GAAGCATTCTTGCTAGCTTGGGAACTTCCACCAATGTGGATATCCAAAAAGGAGTATGAGG  
AAAACGGAGTTGGCATTGTGAGAAAGCGATGCAAATAG

---

Appendix S2. *cal1* resulting coding sequences retrieved from the genomic sequences

>*Trichoderma* sp. T214

ATGGCTGATTCTCTTACCGAAGAGCAGGTCTCTGAGTTCAAGGAGGCCTTCTCCCTCTTTGAC  
AAGGACGGTGATGGCCAGATCACCACCAAGGAGCTGGGCACCGTGATGCGCTCCCTCGGCCA  
GAACCCCTCCGAGTCAGAGCTCCAGGACATGATCAACGAGGTGATGCCGACAACAACGGAT

CTATCGATTTCCCCGAATTCCTGACCATGATGGCACGAAAGATGAAGGACACTGATTCCGAGG  
AGGAGATCCGAGAGGCATTCAAGGTCTTTGACCGCGACAACAACGGCTTCATCTCAGCCGCT  
GAGCTGCGCCATGTCATGACATCCATCGGCGAGAAGCTCACCGACGACGAGGTGATGAGAT  
GATTGCGGAGGCCGATCAGGATGGTGATGGCCGAATTGATTACAATGAGTTTGTCCAGCTTAT  
GATGCAAAAATAA

>*Trichoderma* sp. T065

ATGGCTGATTCACTTACCGAAGAGCAGGTCTCTGAGTTCAAGGAGGCCTTCTCTCTCTTTGAC  
AAGGACGGCGATGGCCAGATCACCACCAAGGAGCTCGGCACTGTCATGCGCTCTTTGGGACA  
GAACCCCTCCGAGTCAGAGCTGCAGGACATGATTAACGAGGTGATGCCGACAACAACGGAT  
CCATCGATTTCCCTGAGTTTCTTACCATGATGGCACGAAAAATGAAGGACACCGATTCCGAGG  
AGGAGATCCGAGAGGCTTTCAAGGTCTTCGACCGCGATAACAACGGCTTCATCTCAGCTGCC  
GAGCTGCGCCATGTCATGACATCTATTGGCGAGAAGCTCACCGACGACGAGGTGATGAGAT  
GATTGCTGAGGCCGATCAGGATGGTGATGGCCGAATTGATTACAACGAGTTTGTTCAGCTCAT  
GATGCAAAAATAA

### Appendix S3. *fasI* resulting coding sequences retrieved from the genomic sequences

>*Trichoderma* sp. T214

ATGCGTCCCGAAGTCGAGCAAGAGCTCGCCACACGCTCCTCGTCGAGCTTCTGGCATAACCA  
GTTTCGCTCTCCCGTGAGGTGGATTGAGACCCAGGATGTCTTCCTGGCAGAGAGAACAGCCG  
AGCGCATCGTCGAAGTCGGCCCCGAGATACCTTTGGAGTCATGGCAAAGCGCACACTGGCA  
TCCAAGTACGAGGCCTACGACGCCGCCAAGTCGGTTCAGCGACAGATCCTCTGTCTACAACAA  
AGACGCCAAGGAGATCTACTATGATGTAGACCCCGTTGAGGAAGAGCCCCGAGCCTGTTGCCA  
GCTCATCCGCTGCTCCCAAGTCAACCCGCTGCTGCCAGCGCTCCTGCGGCTGCTGCGCCA  
GTTGCTGCTGCTCCCGCTGCCGGCGCTGGACCTGCAGCTCAGGTTCCCGATGTGCCTGTCCAG  
GCTGTCGAGATTGTGCACACCTTGGTTGCACAGAAGCTCAAGAAGTCTCTAGCTGATGTGCCT  
CTTAGCAAGGCCATCAAGGATCTGGTTGGAGGCAAATCCACTCTTCAAATGAGATTCTCGGT  
GACCTTGGAAAGGAATTCGGCTCAACACCTGAGAAGCCCGAAGATACACCTCTCGACGAGCT  
CGCCGCTCTATGCAGGCTACCTTCGATGGCAACCTTGGCAAGCACACAGTATCCCTCATCGC  
TAGGCTCATCTCCTCCAAGATGCCTGGTGGCTTCAACATCACAGTGGCCAGGAAATATCTGGA  
AACAAGATGGGGTCTCGGCCCGGCAGGCAAGACGGAGCATTGCTGCTGGCCTTGACCATGG  
AGCCTACTGCCCGTCTAGGAAACGACGGTGAGGCCAAGGGATTCCTCGACGGAATTGTCCAG  
AAATACGCCGCGAGCGCCGGTATCAGCTTGACATCTGCAGCTGCTTCTGGTGGCTCTGAAGGA  
GGTGCGGGAGGCATGATGATGGATCCCGCCGCCATCGATGCTCTACCAAGGACCAGCGCGC  
CCTGTTCAAGCAGCAGTTGGAGCTCTTTGCCAGATACCTCAAGATGGACCTCCGGGCCGGCG  
ACAAGGCACACATTGACTCCCAGAAATCAGAAAAGGTTCTCCAAGCTCAGCTGGATCTGTGG  
ACCGCCGAGCACGGCGATTTCTACGCTTCTGGTATCGAGCCTGTCTTTAGCCCGCTCAAGGCT  
AGATCCTACGACTCCTCCTGGAAGTGGGCTCGTCAGGATGCGCTCACCATGTTCTACGACATT  
ATCTTTGGTAGACTCAAGACCGTCGACCGTGAAATTGTCAGCCAGTGCATTTCGCATCATGAAC  
AAGTCAAATCCCAAGCTCCTCGAGTTTATGCAGTACCACATCGACAACCTGCCCTACTGAGCGC  
GGTGAGACCTACCAGCTGGCCAAGGAGCTTGGTCAGCAGCTCATTGAGAACTGCAAGGACG  
TTCTGAACCTTTCCCCCGTCTACAAGGACGTTGCTGTCCCCACTGGTCTCGCACCCTGTGG  
ACGCTCGTGGAACCTCAACTACGAAGAGGTTCCCCGCGCCAGCTGCAGAAAGCTCGAGCA  
CTACGTTTCAGCAGATGGCTGAGGGTGGAAAGATTTCCGAGTATGGCAACCGCACCAAGGTGC  
AAAACGACCTGCAGCGTATCTACAAGTTGATCAAGCAGCAGCACAAGATTTCCAAGACTTCT  
CAGCTCGAGATCAAGAGCCTGTACGGCGATGTTCTGCGCTCTCTGGCCATGAACGAGAGCCA  
GATCCTCCCAAGGAGAATGGCAAGGGCCGAAAGCCAGGTCTCAAGGGCACAAACCCCAAC  
AAGGGCCGAGTCGAGACCATCCCCTTCTCCACCTCAAGAGAAAGACCTTGACGGCTGGGA  
CTACAGCAAGAAGCTCACTGCTGTCTACCTCAACTGTCTTGAGGAAGCGGCCAAGGATGGTG  
TCACCTTCCAGGACAAGTATGTCTGATGACTGGTGCCGGTGCCGGTTCCATTGGTGCCGAGG  
TCCTGCAGGGCCTCATCAGCGGAGGTGCCAAGGTTGTGGTTACCACTAGCCGATTCTCTCGAC  
AGGTGACCGAGTACTACCAGTCCATGTACAGCCGCTTTGGCTCTCGCGGATCGCAAATCGTCG  
TCGTTCCCTTCAACCAGGGAAGCAAGCAGGATGTGGAGGCTCTTGTCAACTACATCTACGATG  
CCAAGACCGGTCTCGGCTGGGATCTCGACTTCATTGTTCCCTTCGCTGCCATTCTGAGAACG  
GCCGACAGATTGATAGCATCGATTCCAAGTCGGAGCTGGCTACCGTATTATGCTCACCAACT  
TGATCCGCATGCTTGGCTGCGTCAAGACTCAAAAGGCTGAGCGTGGCTTCGAGACCCGTCCC  
GCCAGGTGCTCCTCCCTCTGTCCCCCAACCACGGTACCTTCGGTAACGATGGTCTCTACTCG  
GAGTCCAAGCTGGCTCTTGAGACCCTCTTCAACCGATGGCACTCCGAGGACTGGGGCCACTA  
CCTCACCATTTGCGGTGCTGTCTATCGGATGGACTCGTGGTACTGGTCTCATGTCTGGCAACAA

CGTTGTTGCTGAGGGTGTGGAGGCGTTTCGGCGTGCGAACCTTCTCCCAGCAAGAGATGGCCT  
TCAACCTGTTGGGCTGATGTCAGCTACCATGTTGATCTCTGCCAGTCAGAGCCCGTCTTTG  
CCGACTTGAACGGTGGCCTGCAATTCATCCCCAACCTGAACGAGTCCATGACCAAGCTCCGC  
AAGGATATCATGGAGACTAGCGAAATCCGCAGAGCCGTTACCAAGGAGAGCGCTATCGAGAA  
CACCATTGTTAACGGAGCCGACTCCGAGGTTCTTTACAAGAAGAAGACTATCGAGCCCCGTG  
CCAACATCAAGTGTGACTTCCCTCACCTGCCTGACTGGAAGACGGAGGTGGCCCCCTCTCAAC  
GACCAGCTGAAGGGCATGGTTGACTTGGAGAAGGTCATTGTTGTGACCGGTTTTGCGGAAGT  
TGGTCCCTGGGGTAACTCTCGAACTCGATGGGAGATGGAGGCCTATGGCGAGTTTTGCTCGA  
AGGTTGCATCGAAATGGCCTGGATCATGGGCCTTATCAAGAACCACAACGGTCCCCCTCAAGG  
GCAAGCCCTATGCTGGCTGGGTTGACGCCAAGACTGGCGAGCCCGTCGATGACAAGGATGTC  
AAGCAGAAGTACGAGAAGCACATCCTGGAGCACTCCGGTATTCGTTTGATCGAGCCCGAGCT  
GTTCGACGGATATGACCCCAACAAGAAGCAGCTGCTCCACGAGGTCTGTTATCCAAGAGGACC  
TGGAGCCTTTCGAGGCTTCCAAGGAGACTGCAGAGGAATTCCGACGCGAGCATGGTGACAA  
GGTGGAGATCTTCGAGATCCCCGAGAGTGGAGAGTACATTGTCCGGGTGAAGAAGGGCGCCT  
CACTCTGGATCCCCAAGGCTCTGCGCTTTGACAGACTCGTCGCCGGTCAGATCCCCACTGGCT  
GGGACCCCAAGCGATATGGTGTCCCCGAGGACATCATCAGCCAGGTGGACCCTGTCACCCTG  
TTCCTTCTCGTGTGACTGCCGAGGCTCTGCTGTCTGCTGGTATCACCGACCCCTATGAGTTCT  
ACAAGTACGTTACGTCTCTGAGGTTGGTAACATTGTGCGCTCTGGTATGGGTGGTGCTGCAG  
CCCTTCGTGGCATGCACAAGGCCGATTCTCGACAAGCCTCTTCAGAACGACATCCTGCAG  
GAGTCTTTTCAACACCATGGCTGCATGGGTCAACATGTTGCTGCTCTCTTCGTCTGGACCTA  
TCAAGACGCTGTGCGGCTTGTGCTACTGCTATTGAGTCTGTGACATTGGTGAGAGACTA  
TTCTCGAAGGCAAGGCACGCATCTGTCTCGTTGGTGGTTTCGACGACTTTGGTGAGGAAGGC  
TCTTATGAGTTCGCCAACATGAAGGCCACCAGCAACAGTGTGGATGAGTTTGCCCATGGCCGT  
ACACCCGGTGAAATGTCACGACCTACTACCACTACCCGAAACGGCTTCATGGAGTCTCAGGG  
ATGTGGTGTCCAGGTTCATGACTGCCAGCTCGCTCTGGACATGGGTGTCCCGATCCACGG  
TATCCTTGCTTTTACCACCACCGCTTCCGACAAGATTGGACGATCCGTCCCTGCGCCTGGCAA  
GGGTGTCTCACTTCTGCCCCGAGAGCATGCTGGCAAGTTCCCATCGCCGCTGCTTGATATCAA  
CTACCGCCGCCGACAGATTGAGCGCCGCAAGAAGCTGATCAAGCAGTGGGAGGAGTCTGAG  
TTGGAGTTCTGACGATGAGGTTGATGCTATGAAGGCTCAGGGCGGTAAATTCGACGAGAA  
GGAGTACGCTCAGGACCGCATGCTGCACATCCAGAAGGAGGCCGCAAGACAAACAAAGGAG  
CTCCTCCGAAGCATGGGTAACAACCTTCTGGAAGAGTGACCCAAGCATCGCTCCTCTCCGAGG  
TGCCCTTGCAACCTGGGGTCTTACCATTGATGATGTCAAGGTGGCCTCGTTCCACGGCACATC  
CACTGGCGCCAACGACAAGAACGAGTCTGCGGCCATCTGCCAGCAGCTGCGTACCTTGCC  
GAAGCGAGGGCAATGCCATTATGGGTGTCTTCCAAAAGTTCCTTACTGGTCACCCCAAGGGTG  
CTGCCGGTGCTTGGATGTTGAACGGCGGCCTGCAGATCCTCAACTCTGGATTGGTCCCTGGTA  
ACAGAAACGCCGACAACATTGACCCCATCATGGAGCAATACGACCTGATTGTCTACCCAGCC  
GTAGCATCCAGACTGACGGAGTCAAGGCCTTCTCCCTGACCTCGTTTGGTTTCGGACAAAAG  
GGAGCCCAGGCAGTCGGTGTTACCCCAAGTATCTGTTTCGCTACCCTCGACGAGAAGACTTA  
CGATGCGTACCGCGTCAAGGTGAGGCCCCGACAGAAGAAGGCCTACCGCTACTTCCACAACG  
GAATGATTAGCAACACCTGTTTGTCTCCAAGGCCAACGCGCCTTACAGCGATGACCAGCTCA  
GCGCTGTGCTGCTGAACCCCGATGCTCGTGTGAGCGAGGATAAGAAGACGGCGGAGCTTAAG  
TATGCCGCCAACTTCATGAAGCAGTCTGAGAAGATCACTCCCGCGACCACCGTCAAGGAGAC  
TCAGCAGGTCATCGAAGCGCTCGCGCACAAAGTGACGAGCAAGAACAGCAACGTGCGCGTT  
GATGTGAGGATATTCCATCCTTCAACATTGACAATGACACGTTTATTGAGCGTAACCTTACCA  
CCCAAGAAGTGGCCTACTGCAAGACTGCCCCTAGCCCGCAGAGCTCATTTGCTGGCCGATGG  
AGTGCCAAGGAGGCCGTGTTCAAGGCCCTTGGTGTGTCAGCAAGGGAGCTGGCGCTGCCTT  
GAAGGACATTGAGATTCTCAAGGACGACACCGGCGCGCCTGTTGTTACTCTCCATGGTGAAG  
CCGCCGCCGCTGCCAAGCAGGCTGGTGTCAAGGAGGTCTCGGTCTCCATTCACACGCCGAC  
AAGCAGGCCGTTGCCGTAGCAGTTGCCATTCTAA

>*Trichoderma* sp. T065

ATGCGTCCTGAAGTTGAGCAAGAGCTCGCCCATACGCTCCTCGTTGAGCTTCTAGCATACCAG  
TTCGCCTCTCCCGTCAGGTGGATTGAGACTCAGGATGTGTTCTTGGCAGAGAAAACGGCCGA  
GCGCATCGTCGAAGTTGGTCCCGCAGATACCTCGGAGTGATGGCCAAGCGCACATTGGCGT  
CCAAATACGAAGCCTACGACGCTGCCAAGTCTGTTTACGCGACAGATCCTCTGCTACAACAAA  
GACGCCAAAGAGATTTACTACGATGTCGACCCCATGAAGAAGAGCCCGAGCCCGCTGCGGC  
CAGCTCATCAGATGCCCCAGCCAGCCTGCTGCGGGCGCCCCCGCGGCTGCTGCTCCGGCTG  
CTGCTGCCCCAGCTCCCTCCTCAGGGCCTGCAGCTCAGGTTCTGATCAGCCAGTGCAGGCT  
GTCGACATTGTACACACCATCGTTGCGCAAAAAGTCAAAAAGTCTCTTAGTGATGTGCCTCTG  
AGCAAGGCCATCAAGGATCTGGTTGGAGGCAATCCACTATGCAGAATGAGATTCTCGGTGAT  
CTTGGCAAGGAATTCGGCTCAACGCCTGAGAAGCCCGAAGATACCCCTCTCGACGAGCTCAG

CGCTTCCATGCAGGCCACCTTCGACGGCAACCTGGGCAAGCACACACAGTCACTCATCGCCA  
GATTGATCTCCTCGAAGATGCCTGGTGGCTTCAATATCACAGTAGCAAGAAAATACCTGGAAA  
CAAGATGGGGCCTTGGTTCTGGTAGACAAGACGGAGCACTGCTGTTGGCTTTGACCATGGAG  
CCTGCTGCTCGTCTAGGCAACGAAGGCGAGGCTAAGGGTTTCCTTGACGGAGTTGTCCAGAA  
ATATGCCGCCAGTGCCGGTATCAGCCTGACATCCACGGCAGCTTCTGGTGGTTCGGAAGGCGG  
CTCGGGAGGCATGATGATGGATCCCGCTGCCATTGACGCCCTCACCAAGGATCAGCGAGCGCT  
GTTCAAGCAGCAGCTCGAGCTCTTTGCCCGATACCTCAAGATCGACCTCAGGTCGGGCGACA  
AGGCGCACATTGAGTCTCAAAAATCAGAAAAGGTCCTGCAGGCCCAGCTCGACCTGTGGACC  
GCAGAGCACGGCGACTTTTATGCCTCTGGTATTGAGCCCGTCTTCAGCCCATTGAAGGCGAGA  
TCTTACGACTCGTCCTGGAATTGGGCTCGTCAAGATGCGCTCACCATGTACTATGACATTATTT  
TCGGTAGACTGCAGACTGTGACCGTGAAATTGTGAGCCAGTGCATCCGCATCATGAACAAG  
TCAAACCCCAAGCTCCTCGAGTTCATGCAGTACCACATCGATAACTGCCCCACTGAGCGCGGT  
GAAACCTACCAGCTCGCCAAGGAACCTTGGCCAGCAGCTCATTGAGAACTGCAAGGAAGTATT  
GGAGCTGTCTCCTGTCTACAAGGACGTTGCCGTTTCCTACAGGTCCTCGCACCACCGTGGATGC  
GCGTGGTAACCTCAACTATGAGGAAGTTCTCGCGCCAGCTGCAGAAAACCTCGAGCACTACG  
TTCAGCAGATGGCCGAGGGCGGAAAGATCTCCGAGTATGGCAACCGCACCAAGGTTCAGAAC  
GACCTGCAGCGTATCTACAAGTTGATCAAGCAGCAACACAAGATGTCCAAGACCTCTCAGCT  
CGAAATCAAGAGCTTGACGGTGATGTTTTGCGCTCCCTGGCCATGAACGAGAGCCAGATTCT  
CAAGGAGAACGGCAAGGGCCGAAAGCCGACCCTGAAGGGCACCAACCTGAACAAGGGCAG  
GGTCGAGACCATTCCCTTCCTCCATCTCAAGAGAAAGACACTTCACGGCTGGGACTACAGCA  
AGAAGCTCACTGCTCTACCTCAACTCTCTCGAGCAGGCTGCCAAGGACGGCGCTACAGTTT  
CAAGACAAGTATGTTTTGATGACTGGTGCTGGTGCCGGATCCATTGGTGCCGAGGTTCTGCAG  
GGCCTCGTCAGCGGAGGTGCCAAGGTTGTGGTCACTACCAGTCGATTCTCCCGAGAGGTCAC  
TGAGTACTATCAGTCCATGTACACCCGTTTTGGCTCTCGCGGATCTCAAATCGTTGTTGTCCCC  
TTCAACCAGGGAAGCAAGCAGGACGTGGAAGCCCTCGTCAATTACATCTACGACGCTAAGAC  
TGGTCTTGGCTGGGATCTCGACTACATCGTTTCCTTTGCTGCCATCCCTGAGAATGGCCGACA  
GATTGATAGCATCGACTCCAAGTCTGAGCTGGCCACCGTATTATGCTGACCAACTTGATCCG  
ATGCTTGGTTACGTCAAGGCTCAGAAGGCTGAGCGAGGCTTCGAAACTCGTCCCGCTCAAGT  
TGTCTTCCCTTTCTCCCAACCACGGTACCTTTGGCAACGACGGTCTCTACTCCGAATCTAA  
GCTGGCTCTTGAGACTCTCTTCAACCGATGGCACTCCGAAGACTGGGGCCACTACCTCACAAT  
TTGCGGTGCTGTTATTGGATGGACTCGCGGTACTGGTCTCATGTCTGGCAACAACATTGTTGCC  
GAGGGTGTTGAGGCGTTTGGTGTCGAACTTTCTCTCAGCAAGAGATGGCTTTCAACCTCCTG  
GGTCTGATGTCCGCTACCATTGTGACCTCTGCCAGTCAGAGCCTGTCTTTGCCGACTTGAAT  
GGTGGTTTGCAATTCATCCCCAACCTGAACGAGGCCATGACCAAGCTTCGCAAGGATATCATG  
GAAACCAAGTGAGATCCGTAGAATCGTTTCTAAGGAGAGCGCTATCGAGAACACTATTGTCAAC  
GGAGCCGACTCTGAGGTTCTTTACAAGAAGAAGACCATCGAGCCTCGTGCCAACATCAAGTT  
TGACTTCCCTCATCTTCCCGACTGGAAGACCGAGGTGCGCCCTCTTAATGACCAGCTCAAGGG  
CATGGTCGACCTGGAGAAGGTAGTCGTTGTCACCGGTTTCGCAGAAGTCGGTCCTTGGGGTA  
ACTCTCGAACCCGATGGGAGATGGAGGCTCATGGCGAATTCTCTCTCGAAGGCTGCATTGAA  
ATGGCCTGGATTATGGGTCTCATCAAGAACCACAATGGTCCTCTCAAGGGCAAGCCTTACGCT  
GGCTGGGTTGACGCTAAGACTGGTGAGCCCGTCGACGACAAGGACGTCAAGCAAAAGTACG  
AGAAGTTCATTCTGGACCACGCCGTATCCGTCTGATTGAGCCTGAGCTGTTTGATGGATATG  
ACCCCAACAAGAAGCAGCTGCTTCACGAGGTTGTCATTGAAGAGGACCTTGAGCCATTGAG  
GCCTCCAAGGAGACTGCCGAAGAGTTCGACGAGAACAGGTGACAAGGTGGAGATTTTCG  
AGATCCCCGAGTCTGGAGAGTTCACCTGTCCGAGTCAAGAAGGGCGCCTCGCTCTGGATCCCC  
AAGGCTCTGCGCTTCGACAGACTCGTCGCTGGCCAGATCCCAACTGGCTGGGACCCCAAGCG  
ATATGGTATCCCCGACGACATTGTGACCCAAGTGGACCCTGTACCTTGTTCTCTCGTGTGCG  
ACCGCTGAGGCTCTCCTGTCTCTGGTATTACCGACCCATACGAGTTCTACAAGTACGTCCAC  
GTCTCTGAAGTTGGTAACATTGTGCGCTCTGGTATGGGTGGTGCTACGGCCCTGCGTGGCATG  
CACAAGGCCAGATTCCAAGACAAGCCTCTTCAGAACGATATCTTGACGAGAGTCCTTCATCAAC  
ACTATGCCTGCTTGGGTGAACATGTTGCTGCTTTCTTCGTCTGGACCTATTAAGACCCCTGTG  
GAGCTTGTCACCGCTATTGAGTCTGTGACATAGGTGTGGAGACCATTTTGGAAGGCAAG  
GCTCGCATCTGCTTGTGCGGTGGTCTCGACGACTTTGGTGAGGAAGGCTCTTACGAGTTCGCC  
AACATGAAGGCCACCAGCAACTCTGTGGATGAGTTTGCTCATGGCCGTACTCCTGGCGAAAT  
GTCACGTCTACGACTACTACCCGAAACGGCTTTATGGAGTCTCAGGGATGTGGTGTCCAGGT  
CATCATGACAGCCAAGCTTGCCCTGGATATGGGAGTCCCTATTACAGGTATCCTTGCTTACACC  
ACCACTGCCCTGTGACAAGATTGGACGTTCCGTCCCTGCTCCTGGCAAGGGTGTTCTCACGTCT  
GCGCGTGAGCACGCTGGCAAGTTCCCTTCGCCACTGCTTGACATCAACTACCGCCGCCGACA  
GATTGAGCGCCGCAAGAAGACGATTAAGCAATGGGAAGAATCTGAGCTGGAGTTCTTGACG  
ATGAAATCGATGCTATGAAGTCTCAGGGCGGTGTCTTTGACGAGAAGGAGTATGCTCAGGATC

GCGTCGCACACATCCGGAGGGAGGCTGCGAGACAAGAAAAGGAGCTCCTCCGAAGCATGGG  
 CAACAATTTCTGGAAGAGCGATCCCTCCATTGCTCCCCTCCGTGGTGCTCTTGCAACATGGGG  
 TCTTACCATTGACGACCTGAAGGTTGCCTCTTTCCACGGTACATCCACCGGTGCCAACGACAA  
 GAACGAGTCTCTGCCGTTTGCCAGCAGCTGCGTCACCTTGGCCGAAGCAAGGGTAACGCCG  
 TCCTGGGTGTCTTCCAGAAGTTCCTGACAGGTCATCCCAAGGGTGCTGCCGGTGCTTGATGT  
 TGAACGGTGGTCTGCAAATCCTGAACACTGGTCTGGTTCCTGGTAACAGGAATGCCGACAAC  
 ATTGACCCCATCATGGAGGACTACGATCTGATTGTTTACCCAGCCGTAGCATCCAGACTGATG  
 GAGTCAAGGCTTTCTCTCTCACCTCGTTCGGTTTCGGACAGAAGGGAGCCCAGGCAGTCGGT  
 GTCCACCCCAAGATACCTGTTTGCCGTTCTCGACGAAAAGACATACCAGGAGTACTGTGCCAA  
 GGTTGAGGCCCCGACAGAAGAAGGCTTACCGATTCTTCCACAACGGCATGATCAGCAACACTC  
 TGTTTCGTCCCCAAGGCTCACGCTCCTTACACCGATGAGCAGCTCAGCGAGGTTCTGATGAACC  
 CTGATGCTCGTGTACCCGAAGACAAGAAGACCAAGGAGCTCAAGTATGCCGATAACTTCATG  
 AAGGCGTCCGAAAAGATTGTCCTGCTGTCAAGGAGACACAGCAGATCATTGAGGC  
 GCTCGCCCAAGGTGACAAGCAAGAGCAGCAACGTTGGCGTAGATGTTGAGGATATCTCTG  
 CCATCAACATTGAGAATGACACTTTTATCGAGCGCAACTTCACTAGCCAGGAGATTGCTTACT  
 GCAAGAGCTCTGCTAGCCCCCAGAGCTCATTGCTGGCCGATGGAGCGCCAAGGAGGCAGTC  
 TTTAAGTCTCTTGGTGTGCGCAGCAAGGGAGCCGGCGCTGCCCTGAAGGATATTGAGATCCTC  
 AAGGATGACTCTGGCGCCCCCTACTGTTACTCTTCATGGCGATGCGGCTGCTGCTGCTAAACAG  
 GCTGGCGTGAAGGAGGTTTCCGTCTCCATCTCGCATGCTGATAAGCAGGCTGTTGCCGTTGCT  
 GTTGCTCACTTTTAA

#### Appendix S4. *lcb2* coding sequences

##### >*Trichoderma*\_sp.\_T214

ATGCCGCGACGGCTTGCAAATCCCTTCTCCTCCAGCCAGTCTGCCATGTCAGCGTCCGAAAAG  
 ACTGGCGAACGACGTCTCTCAACCTCAAAGACCAACCGACTGAGCCAGCTCTTCTCGTCCAG  
 CCCAAAGTCCAAGGACCAGGCCACCATGCATCAAAGCCAGATGAGCACCATCTCGCCGTCTGA  
 CGGTGTGCTACCCACCATTTCGCTGTCCACTGCGACTGGTGAGTCCAACACCGTCGAGCCG  
 ACCACAACGCTGTTCAAGCCTCAGTCGGCCGAGGAGGTGGAGCGACGGCAACGCGTCGAGG  
 CTCAATTTGGCCCGCTGCTTTCTCCTGAGCACTTGTACACCAGCCAGGCCGCGGGGAAGCCCT  
 TCGAGCGGCCGATTGAAGACGAGCCTCCGTACTACTATCTCTTGACCACCTACCTGAGCTACT  
 TGGCGCTCATTCTGTTTGGCCACGTTTCGTGATTTCTTTGGCAAGCGGTTTCGGCGACCGCAAGC  
 GCTATCTGCCTCTCAAGGTTTACAATGGATTGCTCCCTCAATGATGATTCGACAGCTTCTA  
 CACCCGACGCCTCAAGACGCGTCTGGACGACTGCTTTGCCCGCACCCTGTGCGGCTCCCCG  
 GCCGCTTCATCACCTCAAGGACCGCAAGTCGGACGACTACAACCTACACCTACCGCTACACT  
 GGCACCTACACTGAGACGCTAAACATGAGTTCCTACAACCTATCTCGGTTTTGCTCAGTCTGAG  
 GGTCCCTGTGCCGATGCCGTCGAGGAATGCGTCAAGAAGTACGGAGCTACCTTTGCCAGCCC  
 CCGAGCTGACAGCGGCACTTCTGATTTGGCTCTCGAAGTTGAGCGGGAATGCGTCTCTTTGT  
 TGAAAGCCCCGACGCCATGGTCTTCTCCATGGGCTACGTTACCAACTCCAGCACGTTCCCTGC  
 ACTTGTGTCCAAGGGTTGCCTGATCATCTCCGACGAACTGAACCATGCCTCTATCCGAATCGG  
 TGCTCGTCTTTCTGGTGCTGTCATTCAAGTCAAGCACAACGACATGGGCGACCTCGAGCG  
 TGTTCTTCGTGAAGCCATTTCCAGGGCCAGCCAAGGACTCACCGCCCCTGGAAGAAGATTC  
 TCTTGGTTCGTGAAGGCTCTACTCGATGGAAGGTACCATGGTCAACCTGCCCGGAATCCTGG  
 AACTGAAGCGCAAGTACAAGTTTTACCTGTTTCATCGACGAGGCTCACTCCATCGGTGCCCTGG  
 GACCCACGCGCGTGGCGTTTGCGATTACTATGGCGTTGACACCTCGGAAGTCGACATCCTCA  
 TGGGCACTCTGACCAAGTCTTTTCGGCGCCAACGGAGGCTACATTGCTGCGGAGAAGCACATC  
 ATTGACAAGCTCCGACGACCAACGCCTCCACCATCTTTGGCGAGGCCCCTGCCCCCTCGGTT  
 CTCATGCAGATTCTTGCTCCCTCAAGCTGATCAACGGAGATATTTGCCCCGGCCAGGGCGAG  
 GAGCGCTGAAGCGCATTGCCTTCAACTCTCGCTATCTCCGTCTCGGACTCAAGCGTCTCGGC  
 ATGATTGTCACTGGTACGACGACTCACCCATCATCCCCGTCTGCTTTACAACCCCGGAAAG  
 ATGCCTGCCTTCAGTCGCCAGATGCTTGCCCGCAAAATCTCCGTCTGCTGCTCGTTCGTTATCCTG  
 CCACTCCGCTCATCAGCTCGCGTGCTCGTCTCTGCGTCTCTGCTGCCACAACAAGGATGACC  
 TCGACCGAATGCTTATTGCCTGTGACGAGGTTGCCGACCTTCTCCAGCTCAAGTACTCCACTG  
 GAATTGCCGGCGGTTTGGACCCTCTGCCCCGAGGGCGTCGCACCAGAAGACGAGGCTGAGTG  
 GAGAAAGAACACTGGCACTCCCATCAAGGCCCCCGATGGAAGGTTGAGGACGTCATTTCGAC  
 GAGGTGTCGTTGACTGCAAGCTCCCTCTCCGGTGA

##### >*Trichoderma*\_sp.\_T065

ATGCCGCGACGGCTCGCAAACCCCTTCTCCTTACCCAGTCTGCTATGTCAGCATCCGAGAAG  
 ACTGGTGAAAGACGTCTCTCGTCCTCCAAGACCAACCGACTGAGCCAGCTCTTCTCCTCCAG

CCCAAAGTCCAAGGACCAGTCACCACTCGCCGCCATGCCGCAGAGCCAGATGAACACCATCT  
CGCCGTCGACGGTGTGCTGCCCACCATTTGCTGTGACGGCGACTGGCGAGCCCAACAGC  
ATCGAGCCAACCAAGATGCTGTTCAAGCCGCAATCGGCCGAGGAGCAAGAGCAGCGACGAC  
TCGCCGAGTCTCAATTTGGCCCCCTGCTTGATCCGGCCACCGCTATGTCAGCCAGTCCAATG  
GCGAGGAGTTCAAGGAGCCGATTGAGGATATGCCTCCGTACTTCTATCTCCTGACCACCTACC  
TGAGCTATCTCTTCTTGATCATGATGGGCCATTGTGCGGATTACTTTGGCAAGCGCTTCGGAGA  
TAAAAAGCGCTACGACCCCCCTCAAAGTGCGAAACGGGTTGCCCCCTCTCACTGATGATTTG  
ACAGCTTCTACACTCGTCGGCTGAAGGGTCGTTTGGATGACTGCTTTGCTCGCCCTACTTTG  
GCGTTCCCGGTGCTACATTACTCTCAAGGAACGTACGGCAGACAGGCTTAACCGCAACTACC  
ACTACACTGGAAACCACGTCGAGACACTCAATGTGAGCTCCTACAACCTACCTCGGCTTTGCTC  
AATCGCAGGGCCCCCTGTGCCGATGCTGTGATGAATGTGTCAAGAAGTACGGTGTACCGCTG  
CAAGCCCCGCTGGCGATAGCGGCACCTCCGACCTGGCCCTCGAAGTTGAACGCGAAGTTGCA  
ACCTTTGTGCGAAAGCCAGAGGCCATGGTCTTCTCTATGGGTTACGTTACCAACTCCAGTACC  
TTCCCCGCTCTCGTGTCAAAGGGCTGCCTGATTGTCTCTGACGAACTGAACCATGCCTCCATT  
CGTGTGCGGTGCTCGTCTCAGTGGCGCTGTTATCCAGTCTTTCAAGCACAACGACGTGGCCGCC  
CTGGAGCGCGTTCTTCGTGAAGCCATCTCCAGGGCCAGCCAAGGACTACCGCCCCCTGGAA  
GAAGATTCTCGTCGTTGTTGAAGGTCTCTATTCTATGGAAGGCACTATGGTTAATCTGCCGGCA  
ATTGTGGCTCTCAAGCGCAAGTACAAGTTCTACCTGTACGTTGACGAGGCTCACTCCATTGGT  
GCCCTGGGACCCCGTGGCCGTGGTGTCTGTGATTACTTTGGTATTGATCCCTCCGAGGTTGAC  
ATCCTCATGGGACCCCTGACCAAGTCCTTTGGCGCCAACGAGGCTACATTGCGGCAGAGAA  
GCACATCATTGACAAGCTCCGTGCCACCAACGTCTGCTCAATCTATGGCGAAGCCCCCTCTCC  
TTTTGTCTCATGCAGATTCTTACCTCGATCAAGCTGATTAACGGCGATATTTCCCTGGCCAG  
GGCGAGGAGCGTCTCCAGCGAATTGCCTTCAACTCTCGCTATCTTCGCCTTGGACTTAAGCGT  
CTTGGCCTCATCGTTGCTGGCTCTGATGATTCTCCCATTTATCCCCGTTCTGCTGTACAACCCTG  
GAAAGATGCCTGCCTTTAGCCGCGAAATGCTCAAGCGCAACATCTCTGTTGTGCTCGTTGGTT  
ACCCGGCTACCCCGCTCATCAGCTCGCGTGCCGTTTCTGCATCTCTGCCGCTCACAACAAGG  
ATGACCTTGACCGCATGATCAGAGCTTGCGACGAGGTGCGCGAATTGCTTCAGCTCAAGTTCT  
CTTCAGGCATTGCTGGCGGCTTGGAGCCGCTGCCTGCTGGTGTAGCACCAGAAAACGAGGCT  
GAGTGGAGGAGGGCCAACAATGTCGCCATCAAGCCTCCTCGATGGGATGTTGAAGAGGTCAT  
TCGACGAGGTGCCATCGATTGCAAGCTTCTCTGCGATAA

#### Appendix S5. *tef1* resulting coding sequences retrieved from the genome

##### >*Trichoderma*\_sp.\_T214

ATGGGTAAGGAGGACAAGACTCACATCAACGTGGTTCGTTATCACCGGTCACTTGATCTACCAG  
TGCGGTGGTATCGACCGTCGTACCATCGAGAAGTTCGAGAAGGAAGCCGCCGAACCTCGGCAA  
GGGTTCTTCAAGTACGCTTGGGTTCTTGACAAGCTCAAGGCCGAGCGTGAGCGTGGTATCA  
CCATCGACATTGCTCTGTGGAAGTTCGAGACTCCCAAGTACTATGTCACCGTCAATTGACGCTC  
CCGGCCACCGTGATTTTCATCAAGAACATGATCACTGGTACTTCCCAGGCCGATTGCGCTATCCT  
CATATTGCCGCCGCTACTGGTGAGTTCGAGGCTGGTATCTCCAAGGATGGCCAGACCCGTGA  
GCACGCTCTGCTCGCTACACCCTGGGTGTCAAGCAGCTCATTGTTGCCATCAACAAGATGGA  
CACTGCCAACTGGGCCGAGGCTCGTTACCAGGAAATCATCAAGGAGACTTCCAACCTTCATCA  
AGAAGGTCGGCTTCAACCCCAAGGCTGTTGCTTTTCGTCCCATCTCCGGCTTCAACGGTGAC  
AACATGCTCCAGCCCTCCACCAACTGCCCCCTGGTACAAGGGCTGGGAGAAGGAGACCAAGG  
CTGGCAAGTTCAACCGCAAGACCCTCCTTGAGGCTATCGACTCCATCGAGCCCCCAAGCGT  
CCCACGGACAAGCCCCTCCGTCTTCCCCTCCAGGATGTCTACAAGATCGGTGGTATTGGAACA  
GTTCCCGTCCGCCGTATCGAGACTGGTATCCTCAAGCCCGGTATGGTTCGTACCTTCGCTCCCT  
CCAACGTCACCACTGAAGTCAAGTCCGTCGAGATGCACCACGAGCAGCTCGTCGAGGGTGT  
CCCGGTGACAACGTTGGTTTCAACGTCAAGAACGTTTCCGTTAAGGAAATTCGCCGTGGTAA  
CGTTGCCGGTGACTCCAAGAACGACCCCCCATGGGTGCCGCTTCTTTACCGCTCAGGTCAT  
CGTCATGAACCACCCTGGCCAGGTCGGTGCCGGCTACGCCCCGTTCTTGACTGCCACACTG  
CCCACATTGCCTGCAAGTTCGCCGAGCTCCAGGAGAAGATCGACCGCCGTACCGGTAAGGCT  
ACCGAGACTGCCCCCAAGTTCATCAAGTCCGGTGACTCTGCCATCGTCAAGATGATTCCCTCC  
AAGCCCATGTGCGTTGAGGCTTTCACCGACTACCCTCCCCTGGGTGCTTTCGCCGTCCGTGAC  
ATGCGACAGACCGTCGCTGTGCGGTGTCAAGGCTGTGACAAGTCCGCCGCCACCGCTGG  
CAAGGTCACCAAGTCCGCTGCCAAGGCCACCAAGAAATAA

##### >*Trichoderma*\_sp.\_T065

ATGGGTAAGGAGGAGAAGACTCACATCAACGTGCTCGTCATCACTGGTCACTTGATCTACCAG  
TGCGGTGGTATTGACAAGCGTACCATCGAGAAGTTCGAGAAGGAAGCCGCCGAACCTCGGCAA

GGGTTCTTTCAAGTATGCGTGGGTTCTTGACAAGCTCAAGGCCGAGCGTGAGCGTGGTATCAC  
 CATCGACATTGCCCTCTGGAAGTTCGAGACTCCCAAGTACTATGTCACCGTCATTGACGCTCC  
 CGGCCACCGTGATTTTCATCAAGAACATGATCACTGGTACCTCCCAGGCTGACTGCGCTATCCT  
 GATTATCGCTGCCGGTACTGGTGAGTTCGAGGCTGGTATCTCCAAGGATGGCCAGACCCGTGA  
 GCACGCTCTTCTCGCTACACCCTGGGTGTCAAGCAGCTCATCGTTGCCATCAACAAGATGGA  
 CACTGCCAACTGGGCTGAGGCTCGTTACCTTGAGATCATCAAGGAGACCTCCAACCTTCATCAA  
 GAAGGTCGGCTTCAACCCCAAGACCGTTGCCTTCGTCCCATCTCCGGCTTCAACGGTGACA  
 ACATGTTGGCCGCTCCACCAACTGCCCCTGGTACAAGGGCTGGGAGAAGGAGACCAAGGC  
 TGGCAAGTCCACCGCAAGACCCCTTCTCGAGGCCATTGACGCCATTGAGCCCCCAAGCGTC  
 CCACAGACAAGCCCCTTCGTCTGCCCCTTCAGGATGTTTACAAGATCGGTGGTATCGGAACAG  
 TCCCTGTGCGCCGTATCGAGACTGGTGTCTCAAGCCCAGGATGGTTCGTTACCTTCGCTCCCTC  
 CAACGTCAACACTGAAGTCAAGTCCGTTGAGATGCACCACGAGCAGCTCGTTGAGGGTGTCC  
 CCGGTGACAACGTTGGTTTCAACGTCAAGAACGTCTCCGTCAAGGATATCCGCCGTGGTAAC  
 GTTGCCGGTGACTCCAAGAACGACCCCCCATGGGTGCCGCTTCTTTCAACGCCCAGGTCATC  
 GTCATGAACCACCCTGGCCAGGTCGGTGCCGATACGCTCCCGTCTCGATTGCCACACCGCC  
 CACATTGCCTGCAAGTTCTCTGAGCTCCTCGAGAAGATCGACCGCCGTACCGGTAAGGCTACT  
 GAGGCCTCCCCCAAGTTCATCAAGTCTGGTGACTCCGCCATCGTCAAGATGGTTCCCTCCAAG  
 CCCATGTGCGTTGAGGCCTTACCGACTACCCTCCCCTGGGTGCTTTCGCCGTCCGTGACATG  
 CGCCAGACCGTCGCCGTGCGGTGTCATCAAGTCCGTGAGAAAGTCCACTGGTGCTACCGGCAA  
 GTTCACCAAGTCCGCCGCCAAGGCCGCCAAGAAATAA

#### Appendix S6. *rpb2* resulting coding sequences retrieved from the genome

##### >*Trichoderma*\_sp.\_T214

ATGGCTGACTACGAGGACGAATACGACTACGAGAAGTACGGAGACGAGGATGAAGGCATCAC  
 TCCCGAGGATTGCTGGACTGTCTCTCCTTCTTCGAAACCAAGGGTCTCGTATCGCAGCA  
 GACCGACTCTTTTGACGAATTCACCCAGACGACGATCCAGGACCTCGTAAACGAATACTCCAC  
 CATCACACTCGACCAGCCAAACCCTCCTTCGCCACCCGGCCGAACAATAGCCCTTCGTGATA  
 TGAGATCAAGTTTGGAAGCGTCATGGTGTACGTCCCACTATCAGTGAGACGGACGGCACTG  
 TGACTTCTCTGCTCCCTTACGAGTGCCGAGACCGTAACTTGACCTACGCCAGTCCCTCTATAT  
 CAAGATCACTAAAAAGGTGTGCGGTGCTGTTGAGAGGGAGGTTCCCTGCACGAAATGGACG  
 ATGCTCAGCAGGAGGAATACGCAAGAACC GGCGAACACCCTACAAAGCTCGAGTGGAAGA  
 GGAGGAGAACGGCGAAGATGACAACATCGGCAAGTCTGATGACTGGAAGGACATGGTCTTC  
 GTTGGCAAGCTGCCCATCATGGTCAAATCCAAGATTTGTCTGAGCCGTGAACAGGATGAT  
 AGCCTGTTCTTGTCAACGAATGTCCCTACGATCAGGGTGGCTACTTTGTTATCAACGGCAGT  
 GAAAAGGTCTCATCGCCCAAGAGAGATCCGCCGCCAACATTGTCCAAGTCTTCAAGAAGGC  
 CCAGCCCAGTGCCTATACCTATACGGGTGAAATCCGAAGTGCGCTGGAAAAGGGCTCACGGC  
 TCATCTCTAGCATGATGCTCAAGCTGTATGGCAAGGGAGACTCTGCTCGTGGTGGCTTTGGCC  
 AGACTATCCACACCACCTGCCCTTTGTCAAGTCAGATCTTCCCGTCGCCATTGTCTCCGTGC  
 CCTGGGTGTCGTTTCTGATGAAGATATCCTCAACCACATTTGCTACGACCGCAACGACAGCCA  
 GATGCTGGAGATGCTTCGACCTTGTATTGAGGAGGCCTTCTGTGTCCAGGACCGAGAGGTTGC  
 TCTGGATTTTCATCGGAAAGCGTGGAACCGAGACCAAGCTGGTCTCGGACGCGAGAAGCGT  
 GTCCGCGTGGCTAAGGATATCCTTCAGAAGGAGACTCTTCCCCACATTTACAGACAGAGGG  
 AAGTGAAACCAGAAAGGCATTTTCTTGGGATACATGGTGCACAAGCTGTTGCAATGTGCGCT  
 CGGAAGAAGAGAGCCCCGACGATCGTGACCATTGGAAGAAGCGTCTGGATCTGGCGGGT  
 CCCCTGCTGGCAAAGCTGTTCCGTGGTATCATGCAAGGATGAACACTGAGTTGGCCAACTAT  
 CTGAGACGATGCGTGCAGGGCAACCGACACTTCAACCTTGCTGTGGGTATCAAGCCCCGCAC  
 GCTTTCAACGGAATTGAAGTATTCGCTTGCCACAGGAAACTGGGGTGATCAGAAGAAGGCCA  
 TGAGCTCAACTGCAGGTGTGTCCAGGTGCTTAACCGTTACACGTTTGCTTCGACCCATCAC  
 ATTTGCGTCTGTACCAATACTCCTATCGGAAGAGATGGTAAGCTCGCAAAGCCTCGACAGCTTC  
 ACAACACGCACTGGGGTTTGGTCTGCCCGGCCGAGACACCCGAGGGACAGGCTTGTGGTCT  
 GGTCAAGAACTTGTCTTTGATGTGTACGTGCTGCGTTCTCCCTCCGAACCTCTGATTGA  
 GTTCATGATCAACAGAGGTATGGAAGTCGTGGAAGAGTACGAGCCGCTGCGGTATCCTCATGC  
 TACAAAGATTTTGTGAACGGTGTCTGGGTGGAGTCCACCAAGACCCTAAGCACTTGGTGA  
 ACCAGGTCCTGGACACTCGTCGCAAGTCCTATCTGCAATACGAAGTCTCTCTCGTGAGAGAA  
 ATTCGAGACCAGGAATTCAAATCTTTTCCGACGCAGGCCGTGTAATGCGGCCAGTCTTTACC  
 GTTCAGCAGGAAGATGATCCGGAACGGGCATCAACAAGGGCCACCTGGTATTGACCAAGGA  
 GCTCGTCAATAGATTGGCCAAGGAGCAGGCTGAACCTCCGGAAGACCCAGCATGAAGATTG  
 GATGGGAGGGATTGATTAGGGCTGGTGCAGTTGAATATCTCGACGCCGAGGAAGAGGAGACG  
 TCCATGATCTGCATGACGCCAGAGGATCTCGAGCTGTATCGTCTTCAGAAGGCTGGTATTAAC



ACTGAGGAAGACATGGGAGATGACCCGAACAAGCGACTAAAGACCAAGACAAACCCGACTA  
CTCACATGTACACCCATTGCGAGATTACCCAAAGTATGATCTTAGGCATCTGTGCTAGTATCATT  
CCTTTCCCGATCACAACCAGTCCCCCGTAACACTTACCAATCTGCCATGGGTAAGCAAGCT  
ATGGGTTTCTTCTCACAACTATTTCCCGGCGCATGGACACCATGGCCAACATTCTCTACTACC  
CCCAGAAGCCGCTGGGTACCACTCGATCCATGGAGTTTTTGAAGTTCCGAGAGTTGCCTGCTG  
GTCAGAACGCCATTGTAGCCATTGCCTGTTACTCTGGTTACAACCAGGAAGATTCCGTCATTAT  
GAACCAGAGTAGTATTGACAGAGGTCTTTTCCGAAGTCTCTTCTTCCGATCATACTCGGATCA  
GGAGAAGAAGGTTGGATTGAACTACACCGAAGTGTGTTGAGAAGCCATTCCACCAAAACACTC  
TTCGCATGAAGCACGGCACATACGACAAGCTGGATGAAGACGGTATCGTTGCTCCTGGTGTCC  
GAGTATCTGGTGAAGATATCATTATTGGCAAGACGGCGCCGATTGACGCTGAGACACAAGATC  
TCGGTACCAGGACGACTATGCACCAGAGGCGAGATATCTCAACTCCTCTGCGTAGCACTGAGA  
ACGGTATCGTTGACTCTGTCAATTGTGACAGTGAACGCGGACAATGTCAAGTATGTCAAGGTCC  
GTGTCCGAACGACCAAGATTCTCAGATTGGAGACAAGTTCGCCTCTCGTCACGGTCAAAAG  
GGCACTATTGGTGTTACTTACCGACAAGAGGACATGCCCTTCACAAGAGAAGGTGTCACTCC  
AGACATCATCATCAACCTCACGCCATTCCATCCCGTATGACAATCGCTCACTTGATTGAGTGT  
CTCCTAAGTAAGGTCTCTACGCTGGAAGGTATGGAGGGTGATGCCACCCCTTCACGGATGTC  
ACCGTCGACTCGGTCTCAGAGCTGTTGCGAAAGCACGGCTACCAGTCACGAGGCTTTGAGAT  
TATGTACAATGGCCACACAGGCCGCAAGCTGAGAGCCAGGTGTTCTTTGGACCAACATACTA  
CCAGCGACTCCGTCACATGGTGGACGACAAGATCCACGCTCGTGCCCGTGGTCCCGTGCAGA  
TTATGACAAGACAACCCGTGGAGGGTCGTGCCAGAGATGGTGGTCTCCGATTCCGAGAAATG  
GAACGTGATTGTATGATTGCTCACGGTGCCGCGCTCCTTCTCAAGGAGCGATTGTTTGAGGTG  
TCAGACGCTTCCGAGTTCACATTTGCGAGATTTGTGGACTCATGACGCTATTGCCAACCTC  
TCTAAACAATCGTTCGAGTGTGACCTTGTAAGAACAAGACCAAGATTGCACAGATTCACATC  
CCTTATGCCGCCAAGCTCCTGTTCCAGGAACTCCAGTCGATGAACATTGCGGCTCGCATGTT  
ACAAACCGGTCTGGCGCGTCCATCAGGTAA

>*Trichoderma* sp. T065

ATGGCTGATTACGAAGACGATTACGACTATGAGAACTATGGGGATGAAGATGAGGGCATCACG  
CCCAGGATTGCTGGACTGTGATTTCTCCTTCTTCGAAACCAAGGGTCTTGATCGCAGCAG  
ACCGACTCCTTTGACGAATTCACGCAGACGACAATCCAGGATCTCGTCAACGAATATTCCACC  
ATCACACTCGATCAGCCCAATCCTCCTTCGCCACCTGGTTCGAACGATAGCCCTTCGCCGATATG  
AAATCAAATTTGGAAGTGTGATGGTATCACGTCCCACTATCAGTGAGACGGATGGAAGTGTGA  
CATCTCTGCTCCCTTACGAATGCCGAGACCGTAACCTTGACTTACGCCAGTCCGCTTTACATCA  
GATCACCAGAAGGTGTCTGCGGCCGTCGAGAGGGAGGTTCCGCTGCACGAGATGGACGAT  
GCCCAACAAGAACAGTATGCAAGGACCGGAGAAAACCCACAAAGCTGGAATGGGAGGAG  
GAAGAAAATGGCGAAGACGACAATCTGGGCAAGTCTGATGACTGGAAGGACATGGTTTTCTG  
TGGCAAGCTGCCCATCATGGTCAAATCCAAGATTTGTGATCTGAGCCGTGAACAGGATGACAG  
CCTGTTCTCTGTCACGAGTGCCCTTACGACCAAGGAGGCTACTTTGTTATCAACGGTAGTGA  
AAAGGTCTCATCGCCCAAGAGCGTTCCGCCGCAAAACATTGTCCAGGTCTTCAAGAAGGCCC  
AGCCCAGTGCCTATACCTACACTGCTGAAATCCGAAGTGCCTGGAAGGGATCTCGACTC  
ATCTCCAGCATGATGCTCAAGTTGTATGGCAAAGGAGACTCTGCGCGAGGTGGTTTTGGACA  
AACTATTCACACAACCCTGCCTTTTGTCAAGTCAGATCTTCCCGTTGCCATCGTTTTCCGTGCC  
TTGGGCGTCTGTTCTGATGAGGATATTCTGAATCACATTTGCTACGACCGAAACGACAGCCAA  
ATGCTCGAAATGCTCCGGCCTTGCAATTGAAGAAGCCTTTTGTGTCAGGACCGAGAAGTTGCT  
CTTGATTTTCATCGGAAAGCGAGGCAATCGTGATCAGGCCGCGCTCGGTCTGAGAAGCGTGT  
TCGTGTAGCAAAGGACATTCTTCAGAAGGAGACGCTTCCCCACATTTCCAGACTGAAGGCA  
GCGAGACCAGAAAGGCATTCTTCCTTGATACATGGTGCACAAGCTGTTGCAATGCGCACTC  
GGAAGACGAGAGCCCGACGACCGAGATCACTTTGGAAAAGAAGCGTCTGGATTGGCGGGTC  
CACTGCTGGCCAAGCTGTTCCGTGGTATCATGCGCAGAATGAATACTGAGCTGGCCAACCTACC  
TGAGACGATGCGTTGAGGGTAACCGCCATTTCACCTTGCTGTTGGCATCAAGCCCGGCACA  
CTTTCCAACGGACTCAAGTACTCACTCGCCACCGGAACTGGGGTGACCAGAAGAAGGCAAT  
GAGCTCGACTGCAGGTGTCTACAGGTGCTTAACCGCTATACTTTTGCTTCTACACTATCTCAT  
TTGCGTCTGATCAATAACCCATCGGAAGAGATGGTAAGCTGGCGAAGCCCCGACAGCTTCA  
CAACACACACTGGGGTTTTGGTGTGCCCGGCCGAGACCCCTGAAGGACAGGCTTGTGGTCTG  
TCAAGAATTTGTCTCTGATGTGTTACGTCAAGTGTGGATCTCCTTCTGAGCCTCTGATCGAGTT  
TATGATCAACAGAGGCATGGAAGTCGTTGAGGAGTATGAGCCACTGAGGTATCCCCATGCCAC  
AAAGATCTTTGTGAATGGTGTCTGGGTGGAATTCATCAAGACCCAAAGCATCTGGTAAACCA  
AGTCTTGGAATCTCGTCGCAAGTCTATCTGCAGTACGAGGTCTCTGATCAGAGAAATTCG  
AGACCAAGAATTCAAAATCTTCTGATGCCGGTCTGTTATGCGACCCGTCTTCACTGTACA  
GCAGGAAGATGACCCGGAACCGGTATCAACAAGGGCCACCTGGTTTTGACTAAGGACCTCG  
TCAATAGACTGGCCAAAGAGCAGGCTGAGCCTCCAGAAGACCCAAGCATGAAGCTCGGATG

GGAGGGGCTGATCAGGGCTGGTGCGGTGGAATATCTCGACGCCGAGGAGGAAGAAACGTCC  
ATGATTTGCATGACACCGGAAGATCTTGAGCTTTATCGTCTTCAAAAGGCCGGCATTGCCACG  
GATGAAGACATAGGAGATGACCCAAATAAGCGTCTCAAGACCAAGACAAATCCGACAACTCA  
CATGTATACGCATTGCGAGATTCACCCGAGTATGATTCTAGGTATCTGTGCTAGTATCATTCTT  
TCCCCGATCACAACCAGTCCCCCGTAACACCTATCAATCCGCCATGGGTAAACAAGCCATGG  
GCTTCTTCTTAACCAACTATTCTCGGCGTATGGACACCATGGCAAATATCCTTTACTACCCTCA  
GAAACCGCTTGGCACCCTCGCTCTATGGAGTTTTTGAAATTCCGTGAGCTGCCAGCCGGAC  
AAAACGCCATTGTAGCAATTGCTTGTTACTCTGGTTACAACCAAGAAGATTCAGTCATTATGA  
ACCAGAGCAGTATTGACAGAGGTCTCTTCCGAAGTCTTTCTTCCGATCATATTCAGATCAAG  
AGAAAAAGGTTGGCTTGAACCTACACGGAAGTGTTTGAGAAGCCATTCCACCAAAACACTCTT  
CGTATGAAGCACGGCACATATGACAAGCTGGACGAAGATGGTATTGTTGCTCCTGGTGTCCTG  
GTGTCAGGTGAGGATATCATCATCGGCAAGACGGCACCAATCGACGCCGAGACGCAGGATCT  
TGGAACCAGGACGACCATGCACCAAGACGCGATATTTGACGCCTTTGCGAAGTACCGAGA  
ACGGCATCGTCGACCAAGTTATTGTGACGGTGAACGCGGATAATGTTAAATATGTCAAGGTCC  
GTGTTGGAACGACCAAGATTCCCCAGATTGGAGACAAGTTTGCTCTCGCCACGGTCAAAAA  
GGCACTATTGGTGTTACTTACCGACAAGAGGATATGCCTTTCTCAAGAGAAGGTCTCACTCCA  
GATATTATTATCAACCCGCACGCCATTCCGTCTCGTATGACAATTGCTCACTTGATCGAGTGTCT  
CCTAAGTAAAGTCTCTACGTTGGAAGGTATGGAGGGTGATGCTACTCCCTTTACGGATGTCAC  
CGTCGACTCCGTCTCAGAGCTCTTGCGAAAGCACGGCTACCAGTCTCGAGGCTTCGAGATTAT  
GTACAACGGCCATACTGGACGCAAGCTCAGGGCACAAGTATTCTTTGGACCAACATACTACCA  
GCGACTCCGCCACATGGTGGATGACAAGATCCATGCCAGAGCTCGTGGTCTGTGCAGATCAT  
GACTCGGCAGCCAGTGGAGGGTCGTGCTCGAGATGGTGGTCTCCGGTTCGGAGAGATGGAAC  
GTGATTGTATGATTGCACACGGTGCAGCGTCCTTCTCAAGGAGCGACTCTTTGAGGTATCGG  
ACGCCTTCCGAGTTCACATTGCGGAGATTTGTGGACTCATGACGCCCATTTGCTAACTTATCCAA  
ACAATCGTTCGAGTGTGACCATGCAAGAACAGACCAAAATTGCACAGATTCACATTCCTTA  
CGCTGCCAAGCTCTTGTTCCAGGAGCTCCAGTCAATGAACATTGCAGCTAGAATGTACACCAA  
TCGGTCTGGTGCATCTGTTCCGGTAG
